# Supplementary material for: Towards electrochemical purification of chemically reduced graphene oxide from redox accessible impurities
Source: Royal Society of Chemistry journal article supplement (doi:10.1039/c4cp00371c), 2014-01-01
Supplement: c4cp00371c1.pdf [file c4cp00371c1.pdf]

## Towards electrochemical purification of chemically reduced graphene oxide from redox accessible impurities

Shu Min Tan, Adriano Ambrosi, Bahareh Khezri, Richard D. Webster and Martin Pumera\*<sup>a</sup>

**Table S-1** Comparison of carbon to oxygen ratios from the atomic percent obtained from the C 1s and O 1s peaks of the wide-scan X-ray photoelectron (XPS) spectra.

| Material  | C/O ratio |
|-----------|-----------|
| CRGO-HU   | 8.70      |
| CRGO-HU-p | 7.99      |
| CRGO-ST   | 9.97      |
| CRGO-ST-p | 8.16      |

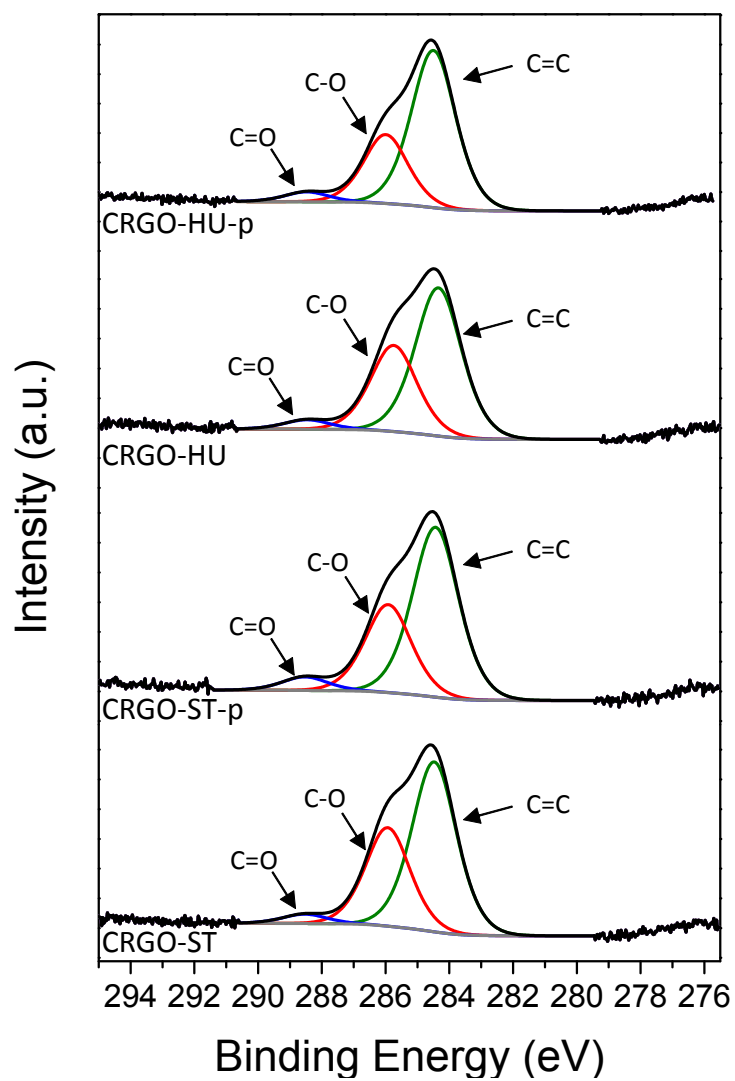

**Figure S-1.** High-resolution XPS C1s spectra of the unpurified and purified materials.
